# Supplementary material for: MaxQuant Software for Ion Mobility Enhanced Shotgun Proteomics
Source: PubMed Central journal article supplement (PMC7261821; doi:10.1074/mcp.tir119.001720), 2020-03-10
Supplement: 155063_1_supp_468101_q4z5cq.pdf [file 155063_1_supp_468101_q4z5cq.pdf]

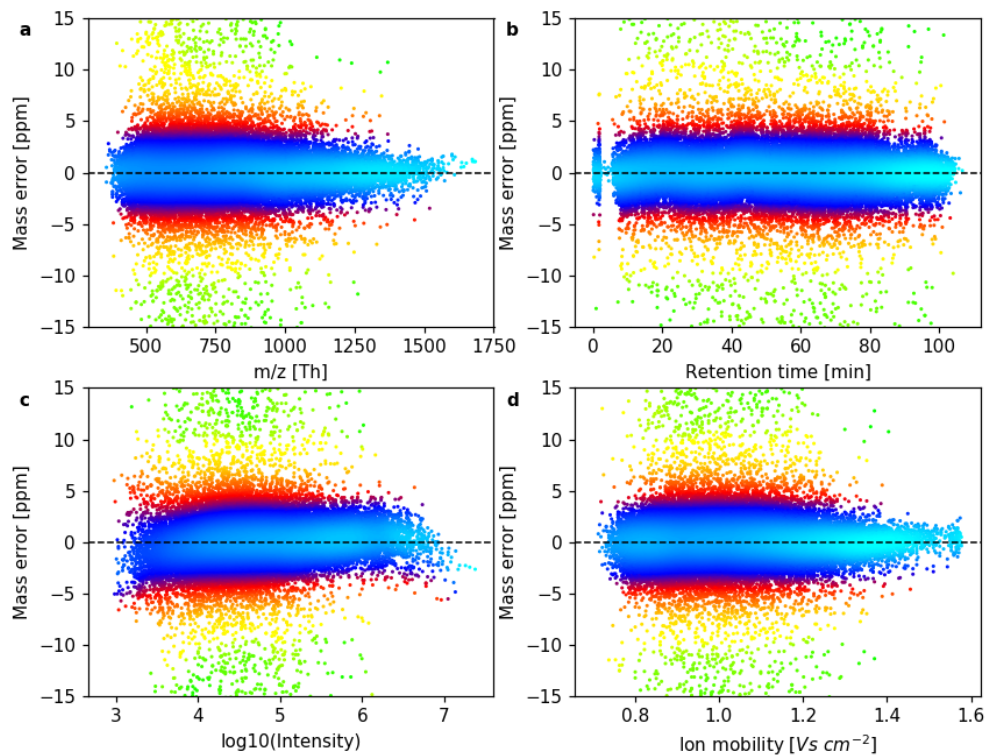

**Supplementary Figure 1. Mass error after recalibration. a.-d.** Residual mass errors after complete recalibration, showing the dependence of the residual mass error on  $m/z$  (**a.**), retention time (**b.**), logarithm of the peak intensity (**c.**) and ion mobility (**d.**). Colors reflect the density of data points.
