# Supplementary material for: MaxQuant Software for Ion Mobility Enhanced Shotgun Proteomics
Source: PubMed Central journal article supplement (PMC7261821; doi:10.1074/mcp.tir119.001720), 2020-03-10

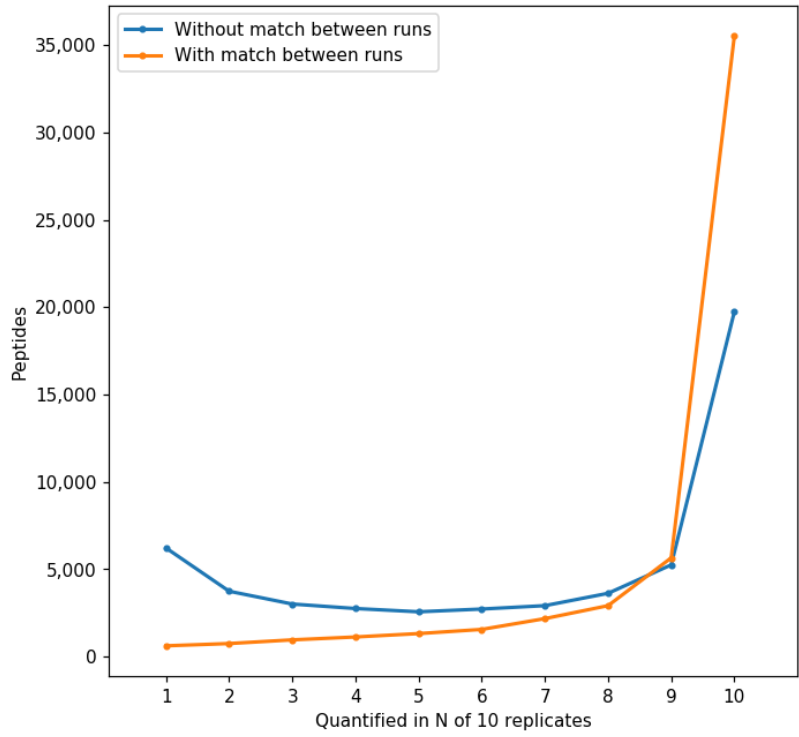

Supplement: 155063_1_supp_468175_q4z9zx.pdf [file 155063_1_supp_468175_q4z9zx.pdf]
